# Supplementary material for: Characterisation of PALB2 tumours through whole-exome and whole-transcriptomic analyses
Source: PubMed Central journal article supplement (PMC8065101; doi:10.1038/s41523-021-00254-4), 2021-04-23
Supplement: 41523_2021_254_MOESM2_ESM.pdf [file 41523_2021_254_MOESM2_ESM.pdf]

## Supplementary information

**Supplementary Table 1.** Characteristics of tumours with germline and somatic PTVs identified in *PALB2*, *BRCA1* and *BRCA2* carriers.

**Supplementary Table 2.** List of tumours with germline alteration and status of LOH.

**Supplementary Figure 1.** Distribution of breast cancer subtype by gene expression data using PAM50 and Integrative Cluster classification.

**Supplementary Figure 2.** Differentially expressed Genes (DEGs).

**Supplementary Figure 3.** The stacked bar plot shows the proportion of major mutational signature for each individual mutation carrier.

**Supplementary Figure 4.** Overall survival in patients with germline and somatic alterations in *PALB2*, *BRCA1* and *BRCA2*.

**Supplementary Data File.** List of differently expressed genes (DEGs) identified in *PALB2*, *BRCA1* and *BRCA2* tumours.

**Supplementary Table 1. Characteristics of tumours with germline and somatic PTVs identified in *PALB2*, *BRCA1* and *BRCA2* carriers.**

| Gene         | Case ID | Age at diagnosis | Tumour size (cm) | Histology subtype | Alteration type | Variant type   | HGVS coding                      | HGVS protein          | Biallelic inactivation | PAM50  | IntClust | Availability of IHC for Tils analysis | Tumour content (%) | Variant Allele Freq |
|--------------|---------|------------------|------------------|-------------------|-----------------|----------------|----------------------------------|-----------------------|------------------------|--------|----------|---------------------------------------|--------------------|---------------------|
| <i>PALB2</i> | SD1204  | 71               | 2.5              | IDC               | Germline        | Frameshift     | c.426_428delGCTinsCC             | p.(Lys142Asnfs*35)    | Yes – LOH              | Basal  | 4-       | No                                    | 80                 | 0.74                |
|              | SD0311  | 41               | 5.0              | ILC               | Germline        | Nonsense       | c.7G>T                           | p.(Glu3*)             | Yes – LOH              | Basal  | 4+       | Yes                                   | 82.5               | 0.51                |
|              | SD0028  | 64               | 2.0              | IDC               | Germline        | Frameshift     | c.1037_1041delAAGAA              | p.(Lys346Thrfs*13)    | Yes - Som inactivation | LumB   | 7        | Yes                                   | 80                 | 0.50                |
|              |         |                  |                  |                   | Somatic         | Frameshift     | c.2762delA                       | p.(Gln921Argfs*2)     |                        |        |          |                                       |                    |                     |
|              | SD0483  | 54               | 1.2              | IDC               | Germline        | Frameshift     | c.1050_1053delAACA               | p.(Thr351Argfs*4)     | No                     | Basal  | 4-       | Yes                                   | 40                 | 0.43                |
|              | SD1054  | 36               | 4.0              | IDC               | Germline        | Frameshift     | c.2167_2168delAT                 | p.(Met723Valfs*21)    | No                     | Her2   | 1        | Yes                                   | 70                 | 0.72                |
|              | SD0221  | 57               | 3.8              | IDC               | Germline        | Frameshift     | c.2760dupA                       | p.(Gln921Thrfs*7)     | No                     | Her2   | 5        | No                                    | 80                 | 0.49                |
|              | SD0386  | 65               | 5                | IDC               | Somatic         | Nonsense       | c.1129C>T                        | p.(Gln377*)           | No                     | NA     | NA       | Yes                                   | 40                 | 0.21                |
|              | SD0516  | 60               | 4.5              | IDC               | Somatic         | Splice site    | c.2514+1G>A                      |                       | No                     | LumB   | 9        | Yes                                   | 62.5               | 0.35                |
|              | SD1238  | 47               | 3.1              | IDC               | Somatic         | Nonsense       | c.1837C>T                        | p.(Gln613*)           | No                     | LumA   | 8        | Yes                                   | 80                 | 0.09                |
| <i>BRCA1</i> | SD0126  | 50               | 3.8              | IDC               | Germline        | Frameshift     | c.686_687delCT                   | p.(Ser229*)           | Yes - LOH              | Basal  | 10       | Yes                                   | 50                 | 0.80                |
|              | SD0128  | 61               | 9.0              | IDC               | Germline        | Frameshift     | c.3869_3870delAA                 | p.(Lys1290Metfs*4)    | Yes - LOH              | Basal  | 10       | Yes                                   | 85                 | 0.75                |
|              | SD0457  | 37               | 6.0              | Medullary         | Germline        | Nonsense       | c.2635G>T                        | p.(Glu879*)           | Yes - LOH              | Basal  | 10       | Yes                                   | 70                 | 0.89                |
|              | SD0594  | 40               | 4.5              | IDC               | Germline        | Nonsense       | c.2635G>T                        | p.(Glu879*)           | Yes - LOH              | Basal  | 10       | Yes                                   | 45                 | 0.62                |
|              | SD0901  | 54               | 3.0              | IDC               | Germline        | Frameshift     | c.3424delG                       | p.(Ala1142Hisfs*13)   | Yes - LOH              | Basal  | 10       | Yes                                   | 80                 | 0.69                |
|              | SD1496  | 30               | 1.2              | IDC               | Germline        | Frameshift     | c.3770_3771delAG                 | p.(Glu1257Glyfs*9)    | Yes - LOH              | Basal  | 10       | Yes                                   | 85                 | 0.58                |
|              | SD0342  | 33               | NA               | IDC               | Germline        | Pathogenic MS  | c.5072C>A                        | p.(Thr1691Lys)        | Yes - LOH              | Basal  | 10       | Yes                                   | 35                 | 0.74                |
|              | SD0092  | 51               | 1.5              | IDC               | Germline        | Frameshift     | c.3770_3771delAG                 | p.(Glu1257Glyfs*9)    | No                     | Normal | 4-       | No                                    | 32.5               | 0.60                |
|              | SD1008  | 33               | 8.0              | IDC               | Germline        | Nonsense       | c.4372C>T                        | p.(Gln1458*)          | No                     | Basal  | 4-       | Yes                                   | 45                 | 1.00                |
|              | SD1177  | 37               | 2.5              | IDC               | Germline        | Splice site    | c.5406+1_5406+3delGTA            | -                     | No                     | LumA   | 7        | Yes                                   | 30                 | 0.30                |
|              | SD0054  | 86               | 9                | IDC               | Somatic         | Frameshift     | c.5503delC                       | p.(Arg1835Glyfs*8)    | No                     | Basal  | 10       | Yes                                   | 82.5               | 0.14                |
|              | SD0261  | 42               | 3.5              | IDC               | Somatic         | Nonsense       | c.520C>T                         | p.(Gln174*)           | No                     | Her2   | 10       | Yes                                   | 80                 | 0.24                |
|              | SD0904  | 53               | 2.5              | IDC               | Somatic         | Frameshift     | c.3257delT                       | p.(Leu1086*)          | No                     | Basal  | 4-       | Yes                                   | 30                 | 0.14                |
|              | SD1120  | 43               | 3.4              | IDC               | Somatic         | Nonsense       | c.5431C>T                        | p.(Gln1811*)          | No                     | Basal  | 9        | Yes                                   | 30                 | 0.22                |
|              | SD1396  | 39               | 0.5              | IDC               | Somatic         | Frameshift     | c.3664delG                       | p.(Glu1222Serfs*13)   | No                     | Basal  | 10       | No                                    | 32.5               | 0.13                |
| SD1180       | 56      | 1.5              | IDC              | Somatic           | Frameshift      | c.1881_1884dup | p.(Arg629Glnfs*2)                | No                    | LumA                   | 7      | Yes      | 80                                    | 0.23               |                     |
| <i>BRCA2</i> | SD1051  | 68               | 3.7              | IDC               | Germline        | Frameshift     | c.4467_4474delAATACTGainsTGTTTTT | p.(Lys1489AsnfsTer15) | Yes - LOH              | Basal  | 10       | Yes                                   | 50                 | 0.44                |
|              | SD0757  | 72               | 2.0              | IDC               | Germline        | Splice site    | c.-39-1_-39delGA                 | -                     | Yes - LOH              | LumA   | 3        | Yes                                   | 80                 | 0.79                |
|              | SD1183  | 47               | 2.7              | IDC               | Germline        | Frameshift     | c.1368_1369delGA                 | p.(Lys457Alafs*4)     | Yes - LOH              | LumB   | 9        | Yes                                   | 85                 | 0.73                |
|              | SD1349  | 36               | 12.0             | IDC               | Germline        | Frameshift     | c.5896dupC                       | p.(His1966Profs*2)    | Yes - LOH              | NA     | NA       | Yes                                   | 85                 | 0.83                |
|              | SD1431  | 52               | 3.0              | Pleomorphic ILC   | Germline        | Nonsense       | c.7878G>A                        | p.(Trp2626*)          | Yes - LOH              | LumB   | 9        | Yes                                   | 85                 | 0.77                |
|              | SD1556  | 60               | 2.2              | IDC               | Germline        | Nonsense       | c.7878G>A                        | p.(Trp2626*)          | Yes - LOH              | LumA   | 1        | Yes                                   | 55                 | 0.65                |
|              | SD1240  | 54               | 2.4              | IDC               | Germline        | Frameshift     | c.2176delG                       | p.(Val726Phefs*4)     | Yes - LOH              | LumB   | 9        | No                                    | 60                 | 0.78                |
|              | SD1245  | 37               | 1.5              | IDC               | Germline        | Frameshift     | c.1298dupA                       | p.(Asn433Lysfs*19)    | No                     | Basal  | 3        | Yes                                   | 47.5               | 0.27                |
|              | SD0163  | 41               | 2.5              | IDC               | Germline        | Nonsense       | c.2612C>A                        | p.(Ser871*)           | No                     | LumA   | 1        | Yes                                   | 45                 | 0.56                |
|              | SD0881  | 33               | 9.0              | IDC               | Germline        | Nonsense       | c.7629T>G                        | p.(Tyr2543*)          | No                     | LumB   | 8        | Yes                                   | 75                 | 0.47                |
|              | SD1121  | 45               | 1.2              | IDC               | Germline        | Frameshift     | c.4257delA                       | p.(Asp1420Ilefs*28)   | No                     | Normal | 4+       | No                                    | 35                 | 0.40                |
|              | SD0714  | 49               | 6.3              | IDC               | Somatic         | Frameshift     | c.4808dup                        | p.(Asn1603Lysfs*6)    | No                     | LumB   | 6        | Yes                                   | 80                 | 0.23                |
|              | SD1190  | 69               | NA               | IDC               | Somatic         | Nonsense       | c.1756A>T                        | p.(Lys586*)           | No                     | LumB   | 1        | No                                    | 85                 | 0.35                |
|              | SD1259  | 53               | 2                | IDC               | Somatic         | Frameshift     | c.9097dup                        | p.(Thr3033Asnfs*11)   | No                     | LumB   | 7        | Yes                                   | 70                 | 0.43                |

Pathogenic MS: pathogenic missense; IDC: invasive ductal carcinoma; ILC: Invasive lobular carcinoma.

**Supplementary Table 2: List of tumours with germline alteration and status of LOH.**

| Gene         | Sample ID | Genomic locus LOH [WES] |                  | Variant alternate allelic freq [WES] |             | Genome wide copy number [sWGS] |                            | Combined call |
|--------------|-----------|-------------------------|------------------|--------------------------------------|-------------|--------------------------------|----------------------------|---------------|
|              |           | CN_A_B                  | Presence of LOH? | Tf-Gf                                | Allele loss | Copy number analysis           | Presence of copy loss/gain |               |
| <i>PALB2</i> | SD1204    | 2_2_0                   | Yes              | 0.30                                 | Yes         | No change                      | No                         | Yes           |
|              | SD0311    | 1_1_0                   | Yes              | 0.08                                 | No          | 1 copy loss                    | Yes                        | Yes           |
| <i>BRCA1</i> | SD0126    | 3_3_0                   | Yes              | 0.40                                 | Yes         | 1 copy gain                    | Yes                        | Yes           |
|              | SD0128    | 2_2_0                   | Yes              | 0.23                                 | Yes         | No change                      | No                         | Yes           |
|              | SD0457    | 2_2_0                   | Yes              | 0.59                                 | Yes         | 1 copy loss                    | Yes                        | Yes           |
|              | SD0594    | 2_2_0                   | Yes              | 0.09                                 | No          | 1 copy loss                    | Yes                        | Yes           |
|              | SD0901    | 2_2_0                   | Yes              | 0.28                                 | Yes         | No change                      | No                         | Yes           |
|              | SD1496    | 2_2_0                   | Yes              | 0.16                                 | No          | 1 copy loss                    | Yes                        | Yes           |
| <i>BRCA2</i> | SD0342    | 2_2_0                   | Yes              | 0.20                                 | Yes         | 1 copy loss                    | Yes                        | Yes           |
|              | SD1051    | 2_2_0                   | Yes              | -0.18                                | No          | 1 copy loss                    | Yes                        | Yes           |
|              | SD0757    | 2_2_0                   | Yes              | 0.27                                 | Yes         | 1 copy loss                    | Yes                        | Yes           |
|              | SD1183    | 2_2_0                   | Yes              | 0.23                                 | Yes         | 1 copy loss                    | Yes                        | Yes           |
|              | SD1349    | 2_2_0                   | Yes              | 0.47                                 | Yes         | 1 copy loss                    | Yes                        | Yes           |
|              | SD1431    | 2_2_0                   | Yes              | 0.38                                 | Yes         | 1 copy loss                    | Yes                        | Yes           |
|              | SD1556    | 2_2_0                   | Yes              | 0.18                                 | No          | 1 copy loss                    | Yes                        | Yes           |
|              | SD1240    | 2_2_0                   | Yes              | 0.12                                 | No          | 1 copy loss                    | Yes                        | Yes           |
| <i>PALB2</i> | SD0028    | 4_2_2                   | No               | 0.16                                 | No          | 1 copy gain                    | Yes                        | No            |
|              | SD0483    | 2_1_1                   | No               | 0.08                                 | No          | No change                      | No                         | No            |
|              | SD1054    | 2_1_1                   | No               | 0.27                                 | Yes         | No change                      | No                         | No            |
|              | SD0221    | 2_1_1                   | No               | -0.19                                | No          | No change                      | No                         | No            |
| <i>BRCA1</i> | SD0092    | 2_1_1                   | No               | 0.10                                 | No          | No change                      | No                         | No            |
|              | SD1008    | 2_1_1                   | No               | 0.47                                 | Yes         | No change                      | No                         | No            |
|              | SD1177    | 2_1_1                   | No               | -0.12                                | No          | No change                      | No                         | No            |
| <i>BRCA2</i> | SD1245    | 2_1_1                   | No               | 0.02                                 | No          | No change                      | No                         | No            |
|              | SD0163    | 2_1_1                   | No               | -0.24                                | No          | 1 copy loss                    | Yes                        | No            |
|              | SD0881    | 2_1_1                   | No               | -0.10                                | No          | No change                      | No                         | No            |
|              | SD1121    | 2_1_1                   | No               | -0.10                                | No          | No change                      | No                         | No            |

ASCN analysis as per Sequenza output [B>0: LOH negative; B=0: LOH positive]. Tf: variant alternate allele frequency in tumour; Gf: variant alternate allele frequency in germline. If Tf-Gf>0.20: tumour sample have loss of wildtype allele.

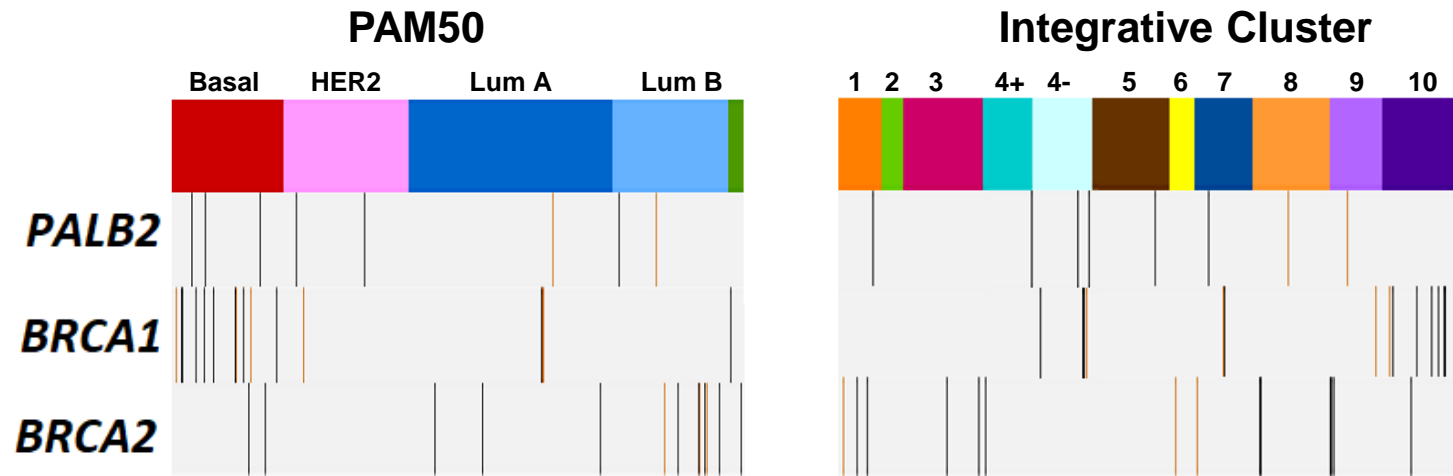

**Supplementary Figure 1. Distribution of breast cancer subtype by gene expression data using PAM50 and Integrative Cluster classification.** The plot compares the distribution of subtype of tumour with integrated germline and somatic alterations in *PALB2* with *BRCA1*, *BRCA2* and tumours with no alterations that arise from non-carriers. Number of samples included in this analysis (excluded those with no RNA-seq data) – *PALB2*: 8; *BRCA1*: 16; *BRCA2*: 13; Non-carriers: 473; “Black” vertical line represents germline PTV carriers whilst the “orange” line represents somatic PTV carriers. The grey space in between carriers comprised of non-carriers.

a. BRCA1, n= 3297 BRCA2, n=1760

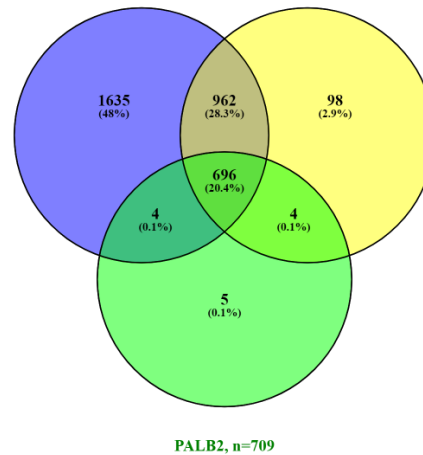

b. GO functional enrichment analysis

| Source | Category/Term                   | Name                                            | Bonferroni-adjusted p-value |                    |                    |
|--------|---------------------------------|-------------------------------------------------|-----------------------------|--------------------|--------------------|
|        |                                 |                                                 | <i>PALB2</i> vs NC          | <i>BRCA1</i> vs NC | <i>BRCA2</i> vs NC |
| GO     | Molecular Function / GO:0044822 | Poly(A) RNA binding                             | 1.24E-91                    | 7.02E-193          | 1.24E-138          |
| GO     | Molecular Function / GO:0005515 | Protein binding                                 | 2.14E-58                    | 4.12E-163          | 1.21E-102          |
| GO     | Cellular Component / GO:0016020 | Membrane                                        | 1.22E-40                    | 2.13E-110          | 3.98E-91           |
| GO     | Cellular Component / GO:0005654 | Nucleoplasm                                     | 9.85E-39                    | 2.05E-139          | 1.41E-72           |
| GO     | Cellular Component / GO:0005829 | Cytosol                                         | 2.49E-36                    | 2.71E-110          | 2.76E-78           |
| GO     | Cellular Component / GO:0070062 | Extracellular exosome                           | 5.73E-35                    | 5.56E-75           | 2.73E-61           |
| GO     | Biological Process / GO:0000398 | mRNA splicing, via spliceosome                  | 1.71E-29                    | 2.36E-35           | 2.70E-31           |
| GO     | Molecular Function / GO:0003723 | RNA binding                                     | 8.18E-24                    | 9.37E-40           | 2.02E-35           |
| GO     | Cellular Component / GO:0030529 | Intracellular ribonucleoprotein complex         | 1.04E-23                    | 9.88E-30           | 6.10E-28           |
| GO     | Molecular Function / GO:0098641 | Cadherin binding involved in cell-cell adhesion | 1.21E-22                    | 2.91E-53           | 8.23E-35           |

c. Pathway enrichment analysis based on KEGG and REACTOME

| Source   | Category/ Term                              | Name                                                                  | Bonferroni-adjusted p-value |                    |                    |
|----------|---------------------------------------------|-----------------------------------------------------------------------|-----------------------------|--------------------|--------------------|
|          |                                             |                                                                       | <i>PALB2</i> vs NC          | <i>BRCA1</i> vs NC | <i>BRCA2</i> vs NC |
| REACTOME | Metabolism of RNA / R-HSA-72163             | Splicing of mRNA - major pathway                                      | 4.2E-26                     | 4.0E-37            | 2.5E-26            |
| KEGG     | Transcription / hsa03040                    | Spliceosome                                                           | 4.6E-15                     | 4.1E-21            | 4.6E-15            |
| KEGG     | Folding, sorting and degradation / hsa04141 | Protein processing in endoplasmic reticulum                           | 5.5E-13                     | 1.2E-24            | 2.5E-18            |
| REACTOME | Metabolism of RNA / R-HSA-72203             | Processing of capped intron-containing pre-mRNA                       | 1.1E-11                     | 1.2E-09            | 2.6E-06            |
| KEGG     | Translation / hsa03013                      | RNA transport                                                         | 1.9E-06                     | 9.4E-13            | 2.9E-11            |
| REACTOME | Metabolism of protein / R-HSA-6807878       | COPI-mediated anterograde transport                                   | 3.1E-05                     | 3.9E-05            | 2.5E-07            |
| REACTOME | Metabolism of RNA / R-HSA-72187             | mRNA 3'-end processing                                                | 1.9E-04                     | 6.6E-07            | 4.9E-05            |
| REACTOME | Metabolism of RNA / R-HSA-159236            | Transport of Mature mRNA derived from an Intron-Containing Transcript | 2.0E-04                     | 1.9E-11            | 1.6E-06            |
| REACTOME | Signal transduction / R-HSA-5625740         | RHO GTPases activate PKNs                                             | 3.0E-04                     | 5.6E-01            | 1.2E-01            |
| REACTOME | Metabolism of protein / R-HSA-1799339       | SRP-dependent cotranslational protein targeting to membrane           | 4.2E-04                     | 2.7E-24            | 8.2E-15            |

GO, Gene Ontology

KEGG, Kyoto Encyclopedia of Genes and Genomes

**Supplementary Figure 2. Differentially expressed Genes (DEGs)** a. Venn diagram showing top significant DEGs after applying a more stringent cutoff ( $-\log_{10} p\text{-value} \geq 50$ ;  $|FC| \geq 5$ ) which overlap across 3 comparisons [*PALB2* vs Non-carrier; *BRCA1* vs Non-carrier; *BRCA2* vs Non-carrier] b. c. Table showing the biological themes that are over-represented in the top significant DEGs in *PALB2* tumours based on Gene Ontology (GO) enrichment analysis and pathway enrichment analysis.

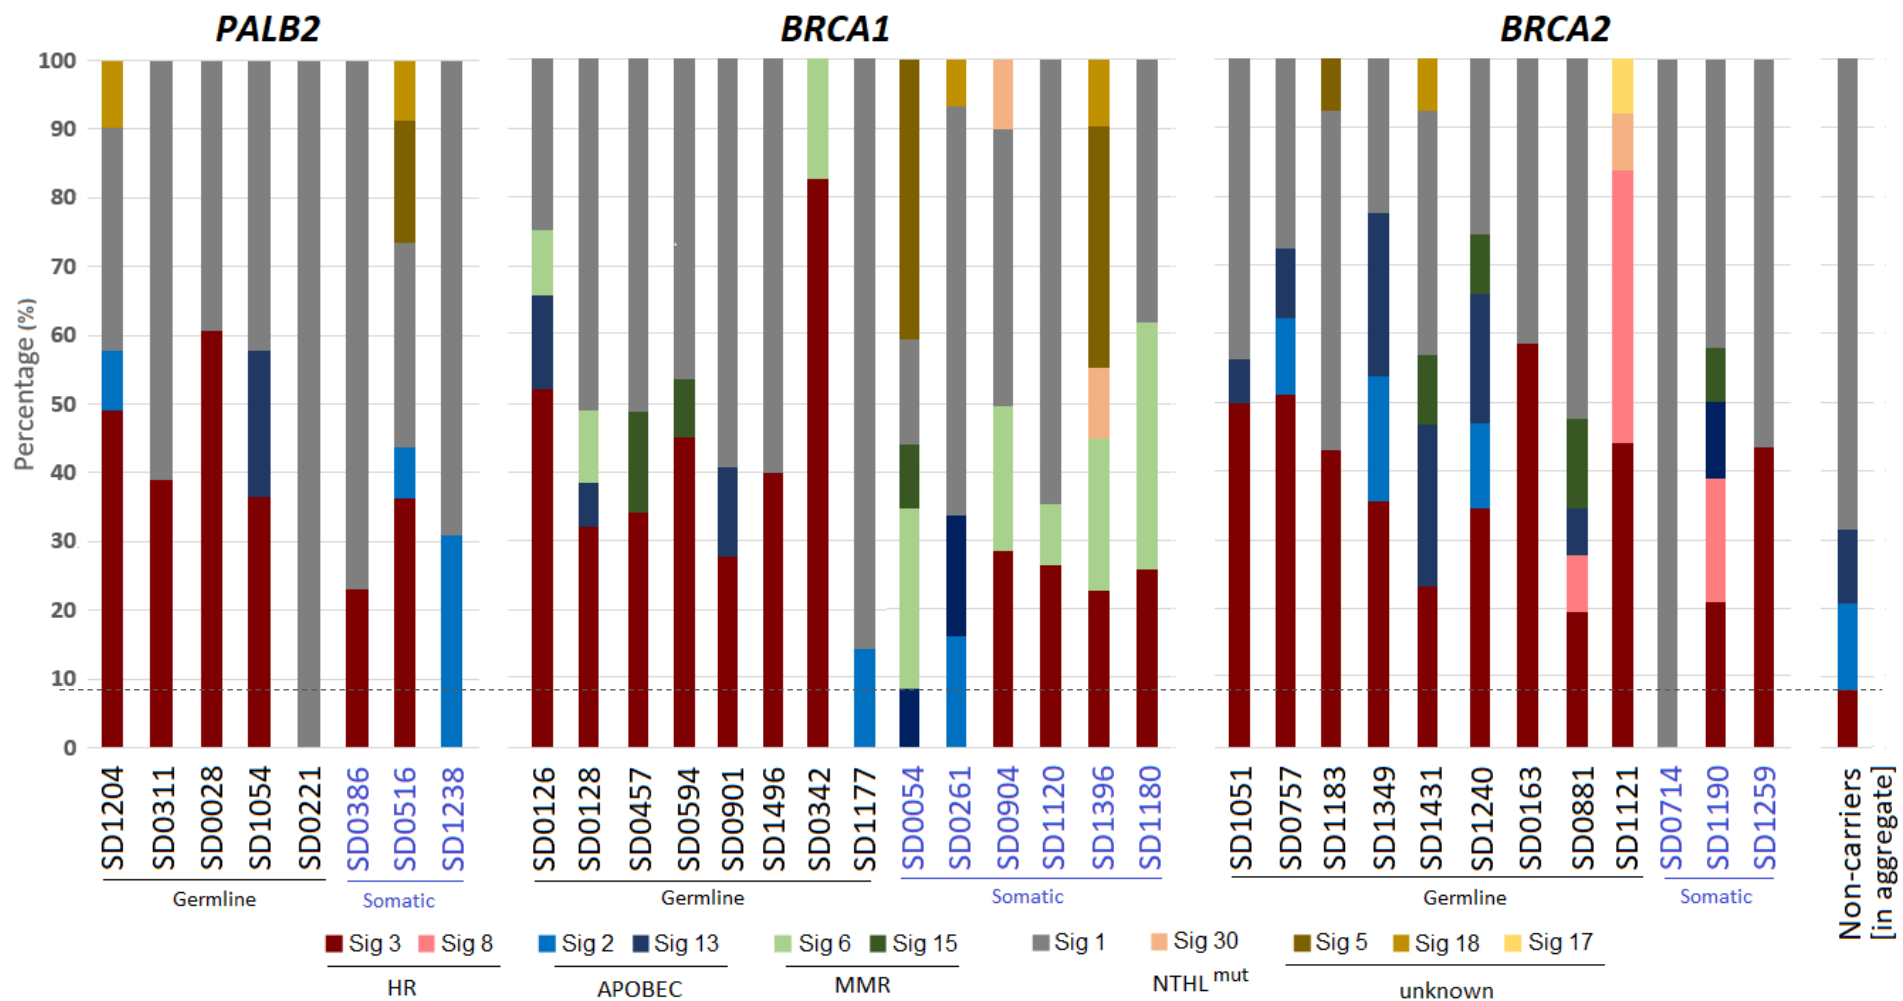

**Supplementary Figure 3.** The stacked bar plot shows the proportion of major mutational signature for each individual mutation carrier. The horizontal grey dashed line indicated the proportion of mutational signature 3 in tumours that arise from non-carriers as reference for comparison. Number of samples included in this analysis (excluded those with <15 SNVs) – *PALB2*: 8; *BRCA1*: 14; *BRCA2*: 12; Non-carriers (n=483, proportion in aggregate).

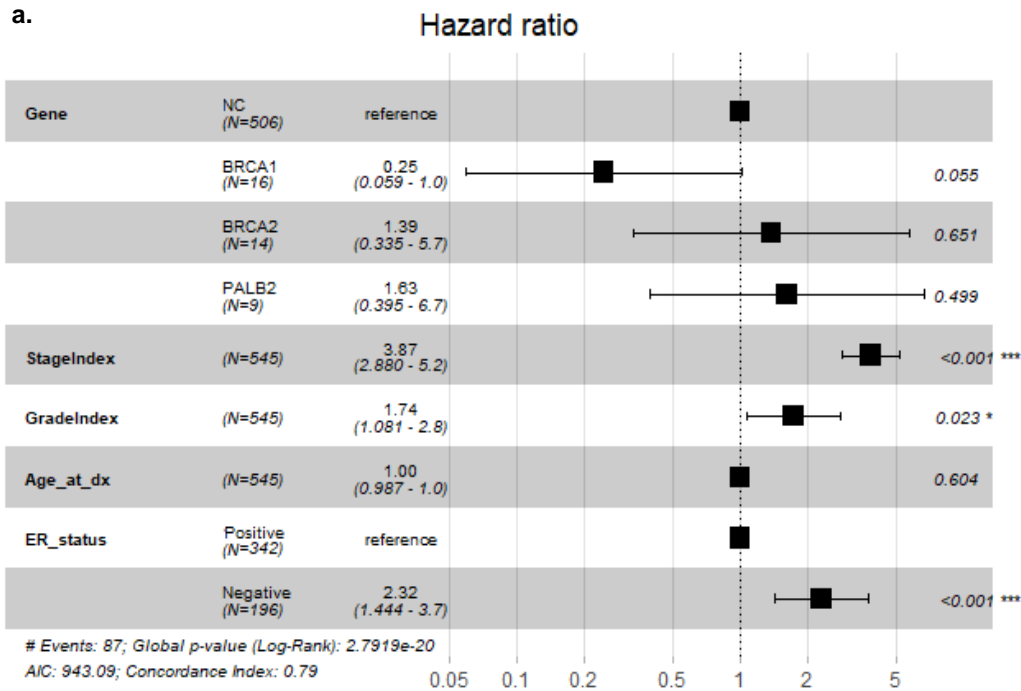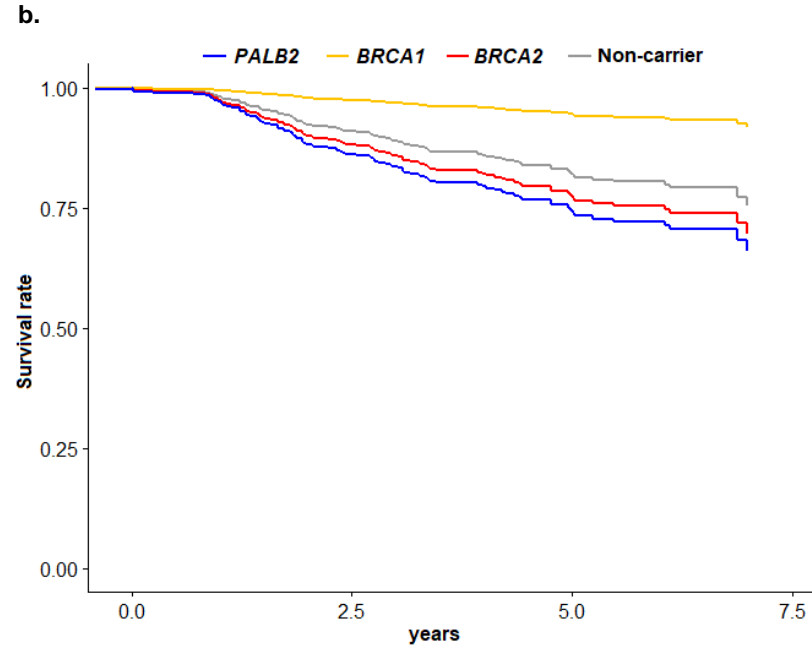

**Supplementary Figure 4. Overall survival in patients with germline and somatic alterations in *PALB2*, *BRCA1* and *BRCA2*** a. Cox Proportional Hazard model of overall survival. b. Adjusted survival curves were calculated based on Cox model. The analysis included all patients who had events (including those less than 3 years) and all patients who were alive were followed up for at least 3 years. Duration of follow-up is 3.0 – 7.5 years (mean: 4.7 years). Number of events – *PALB2*: 3; *BRCA1*: 3; *BRCA2*: 2; Non-carrier (NC): 85.
